# Supplementary material
Source: bioRxiv or medRxiv preprint supplement (https://www.biorxiv.org/highwire/filestream/62242/field_highwire_adjunct_files/3/130948-2.pdf)
Supplement: Supplementary file [file 130948-2.pdf]

# Supplementary Figure 2

**a**

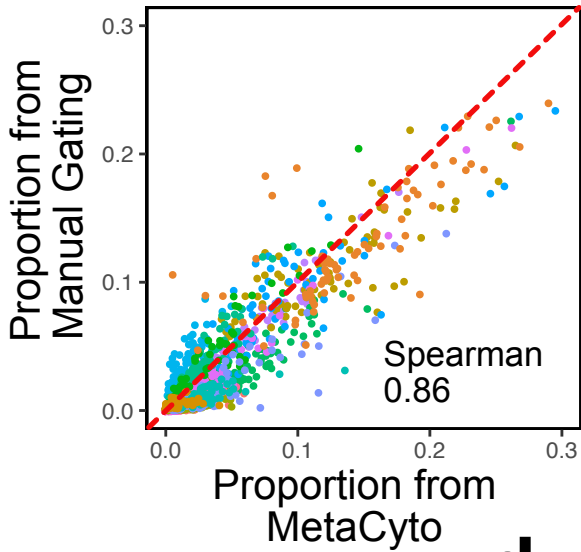

**b**

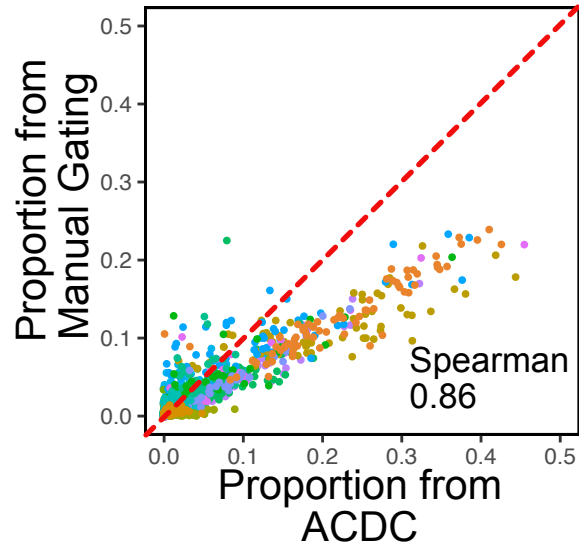

**c**

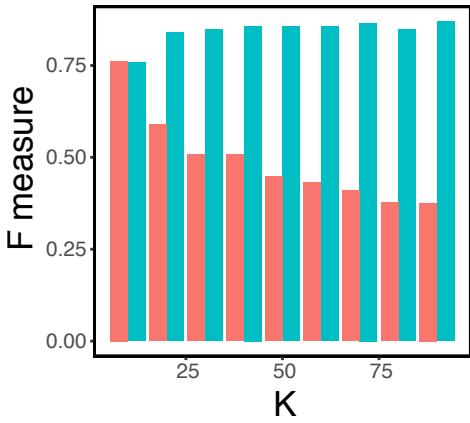

**d**

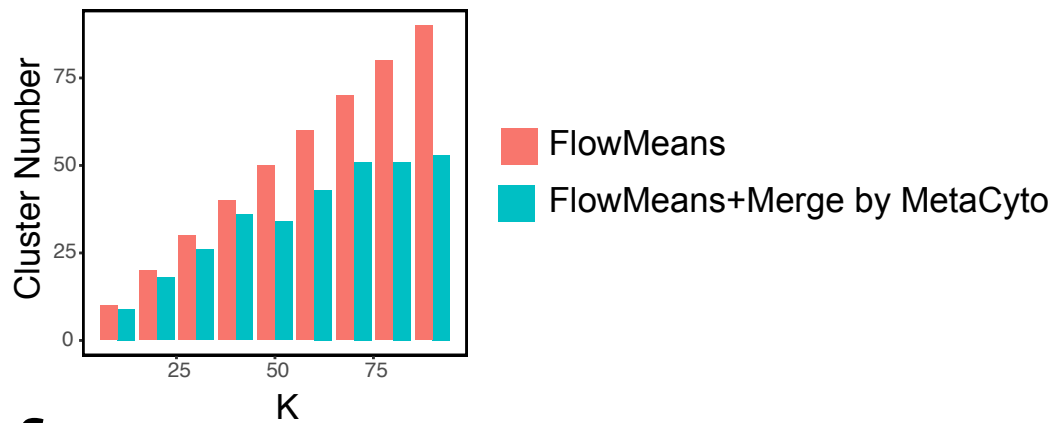

**e**

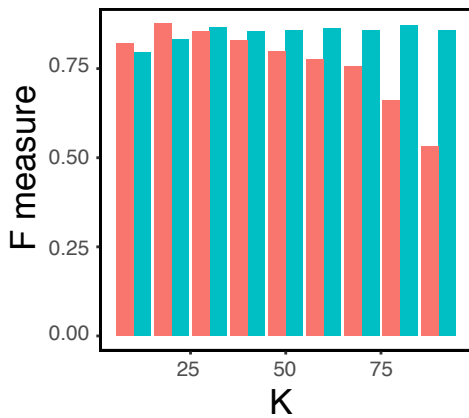

**f**

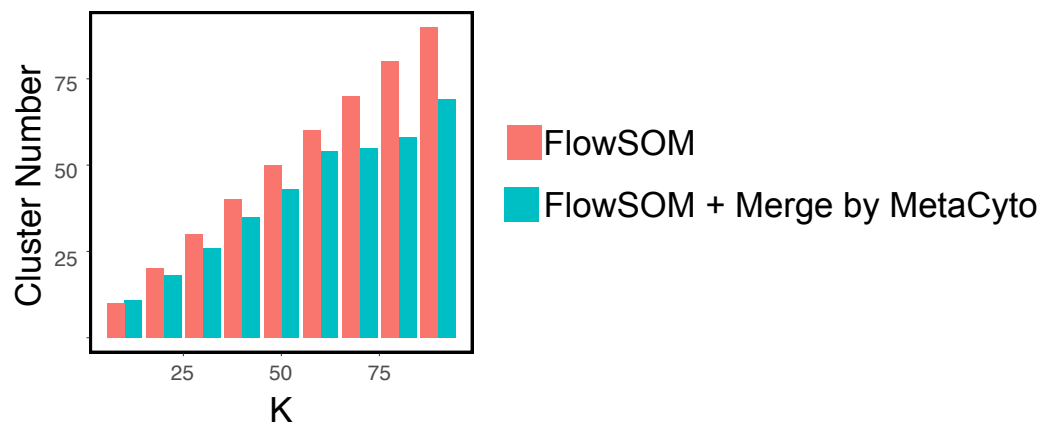

Supplementary Figure 2: MetaCyto accurately identifies cell populations (a-b) Scatter plots showing the comparison between proportions of cell types estimated by the guided analysis pipeline in MetaCyto (a) or ACDC (b) and proportions provided by the authors of SDY478. Each dot represents the proportion of a cell type in a sample. Each color represents a cell type. (c-d) FlowMeans is used to cluster FlowCAP WNV data with K ranging from 10 to 90 with or without MetaCyto. F measure (c) and the number of clusters (d) are showed in the bar plots. (e-f) FlowSOM is used to cluster FlowCAP ND data with K ranging from 10 to 90 with or without MetaCyto. F measure (e) and the number of clusters (f) are showed in the bar plots.
